# Supplementary material for: Two dimensional assembly of triblock Janus particles into crystal phases in the two bond per patch limit
Source: Royal Society of Chemistry journal article supplement (doi:10.1039/c0sm01494j), 2011-01-01
Supplement: c0sm01494j.pdf [file c0sm01494j.pdf]

# Supporting Information on “Two dimensional assembly of triblock Janus particles into crystal phases in the two-bond per patch limit”

Flavio Romano and Francesco Sciortino

## I. DESCRIPTION OF SUPPLEMENTARY MOVIE

We provide a supplementary movie of the crystallization process of the Kagome lattice. A Monte Carlo simulation of system composed of 1000 particles of the model with  $\delta = 0.05$  and  $\cos(\theta) = 0.84$ , starting from a random configuration, is equilibrated at  $T = 0.125$  (a little below the coexistence temperature) at a constant density  $\rho = 0.6$ . Particles are colored according to their characterization: monomers are gray, chain-like particles are red and Kagome-like particles are green. In the very first moments, monomers readily arrange in chains which in turn gradually rearrange into the Kagome lattice. The crystal nuclei than slowly grow.
